# Supplementary material for: Systematic Analysis of the Expression of the Mitochondrial ATP Synthase (Complex V) Subunits in Clear Cell Renal Cell Carcinoma
Source: PubMed Central journal article supplement — Transl Oncol. 2017 Jun 30;10(4):661–8. doi: 10.1016/j.tranon.2017.06.002 (PMC5496479; doi:10.1016/j.tranon.2017.06.002), 2017-06-30

## Supplementary Tables

**Table S1:** PCR primer sequences

| Gene    | Forward Primer         | Reverse Primer          |
|---------|------------------------|-------------------------|
| PPIA    | ATGCTGGACCCAACACAAAT   | TCTTTCACTTTGCCAAACACC   |
| ACTB    | CCAACCGCGAGAAGATGA     | CCAGAGGCGTACAGGGATAG    |
| ATP5A1  | TGCTATTGGTCAAAGAGATCCA | GTAGCCGACACCACAATGG     |
| ATP5B   | CAGCAGATTTTGGCAGGTGAA  | ACCCCTCACGATGAATGCTC    |
| ATPAF1  | GGCTCAGTCCTGTCCAACAT   | AGTTCAGTACCTGTCCATTGTCC |
| ATP5C1  | AGCCGCAATGGATTCAAGTT   | TCTCTCTCAGCTCGGGCATA    |
| ATP5D   | GTCGTGGTGCATGCAGAG     | GAAGAGTCGGCGTTCACTG     |
| ATP5O   | GGTACCTTGACAGTGACCT    | CGGATCAGTCTTAGCCTCCAA   |
| ATPG5F1 | CCTTCCTAGGTCCAGGGGTA   | CCTCAGGGATCAGTCCATAACG  |
| ATP5G1  | GGGTAGTAGGAGTGCAGACTGA | GGGCTATTCAAGAAGGAGGCA   |
| ATP5G2  | CTGAGCTGATCCTCTCTCCTGC | TTCAGCACCACTGCAGATAGC   |
| ATP5G3  | TCAGACCAGTGCAATCAGCA   | GCGAAGGGTTTCTGGCATAAC   |

# Supplementary Figures

**Figure S1:** Validation of gene expression using PCR in a cohort of 18 ccRCC and 10 normal renal tissue samples.

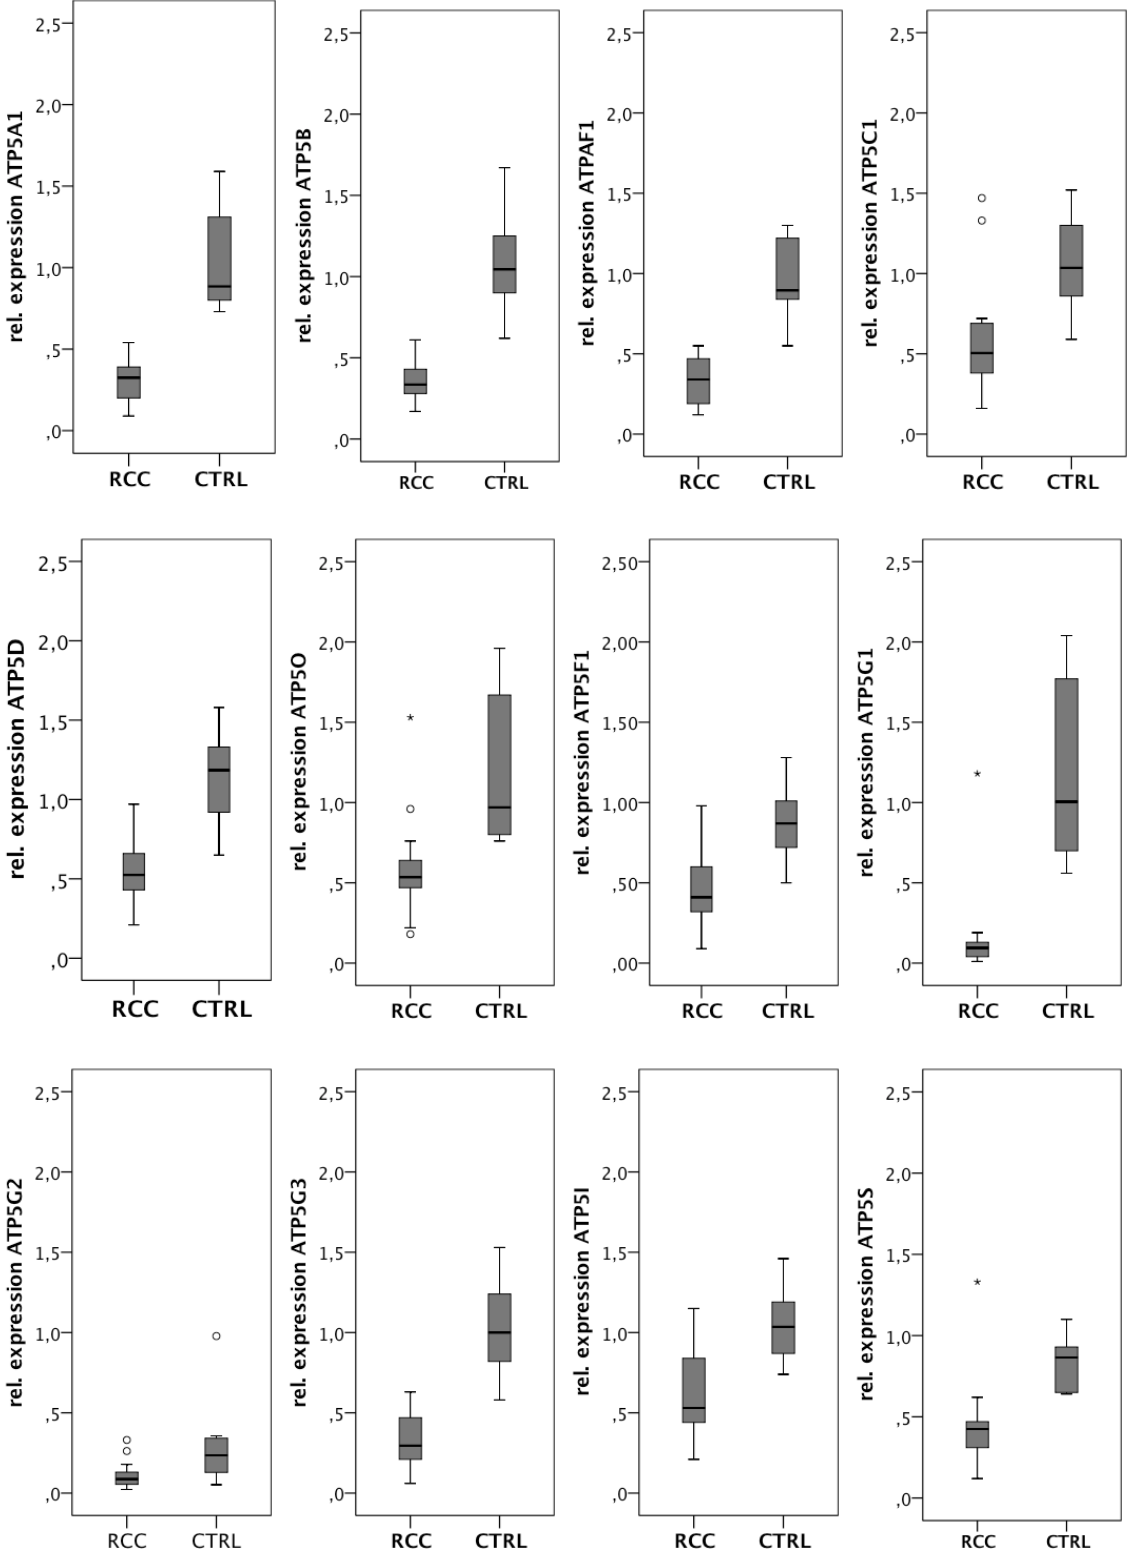

**Figure S2:** Validation of gene expression using PCR in a of cohort of 74 ccRCC and 36 normal renal tissues.

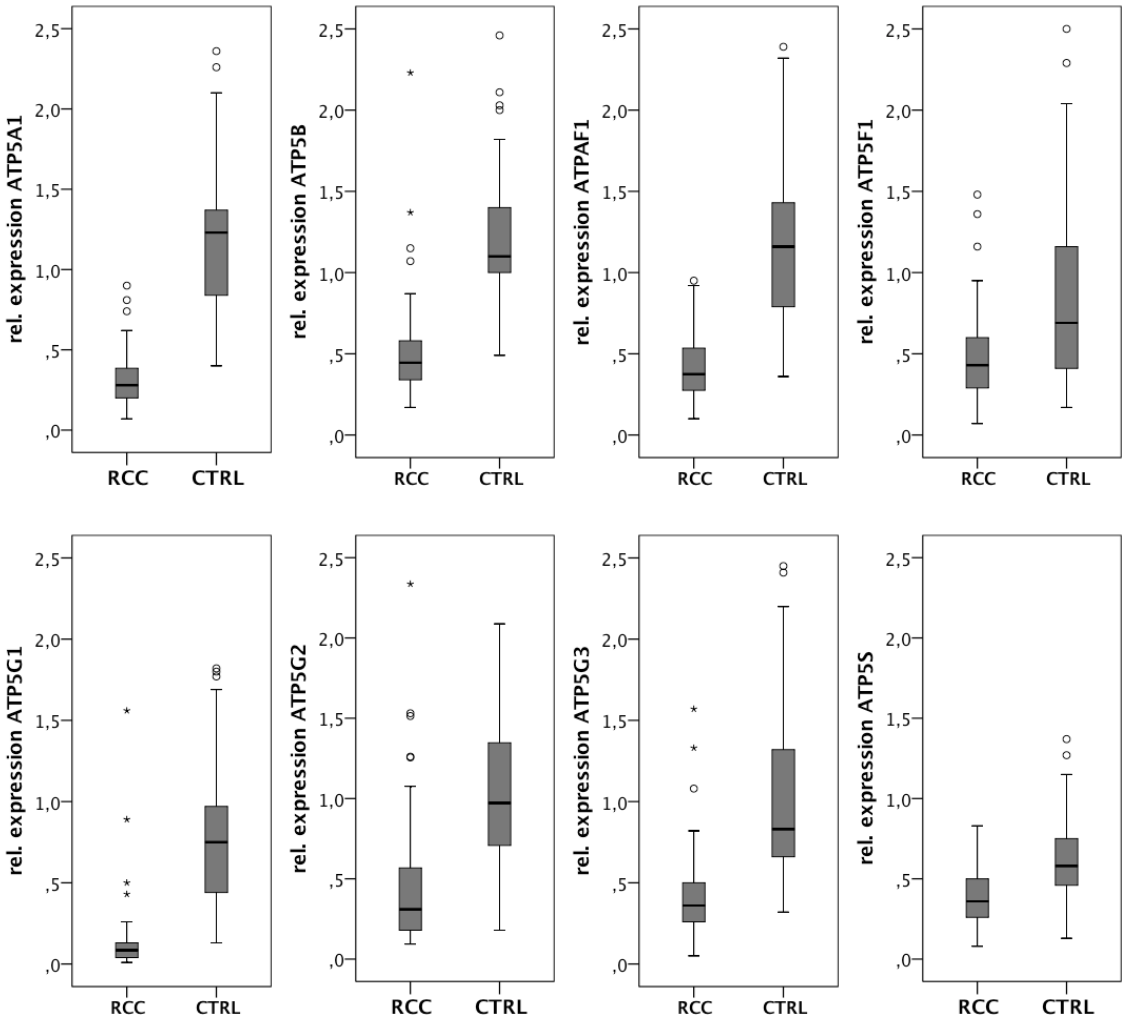

**Figure S3:** Kaplan Meier estimate for the expression of ATP5G2 mRNA expression (dichotomized according the median expression level) as predictor of overall survival in patients with clear cell renal cell carcinoma.

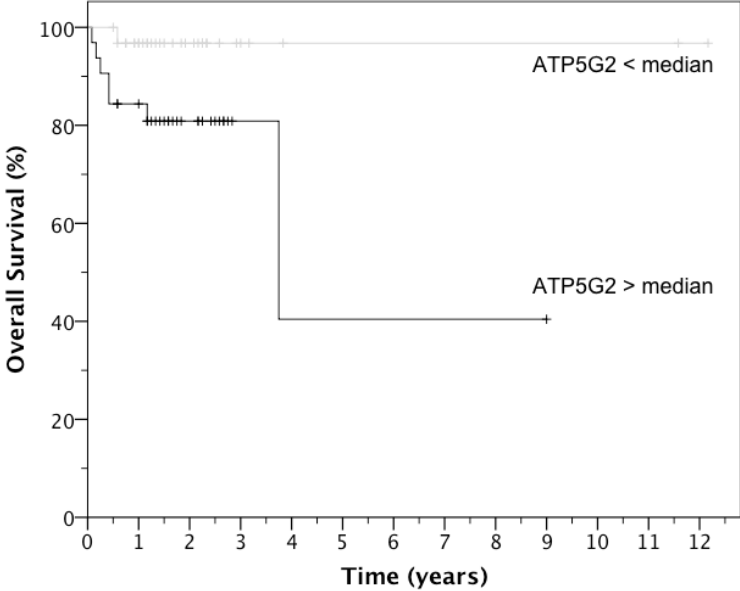

**Figure S4:** Western blot experiments were performed to determine the protein expression in 8 corresponding normal (N) and clear cell renal cell carcinoma (T) tissue. All proteins were decreased in higher grades of the tumor tissue, ATP5G1/G2/G3 showed band of different sizes in some tumor and normal samples.

**GAPDH:**

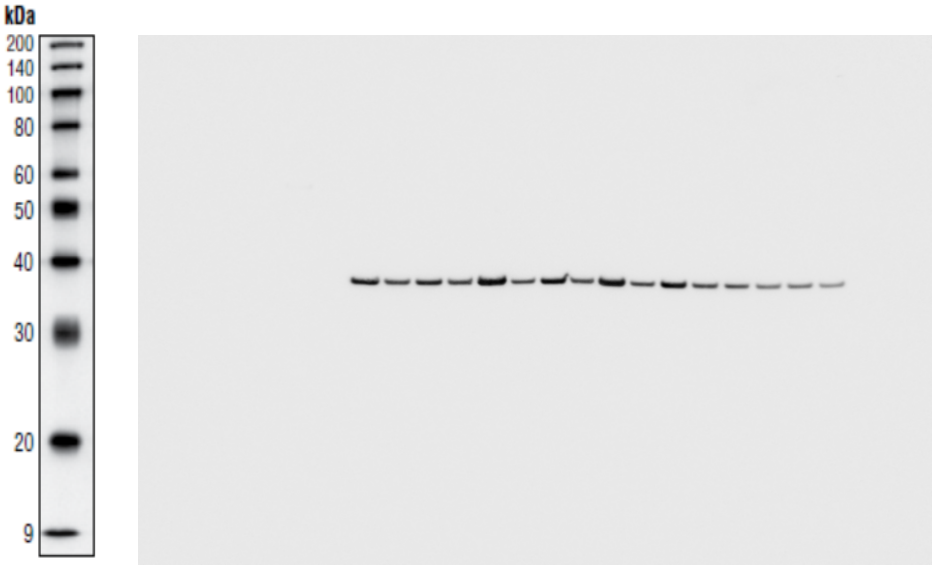

**Actin:**

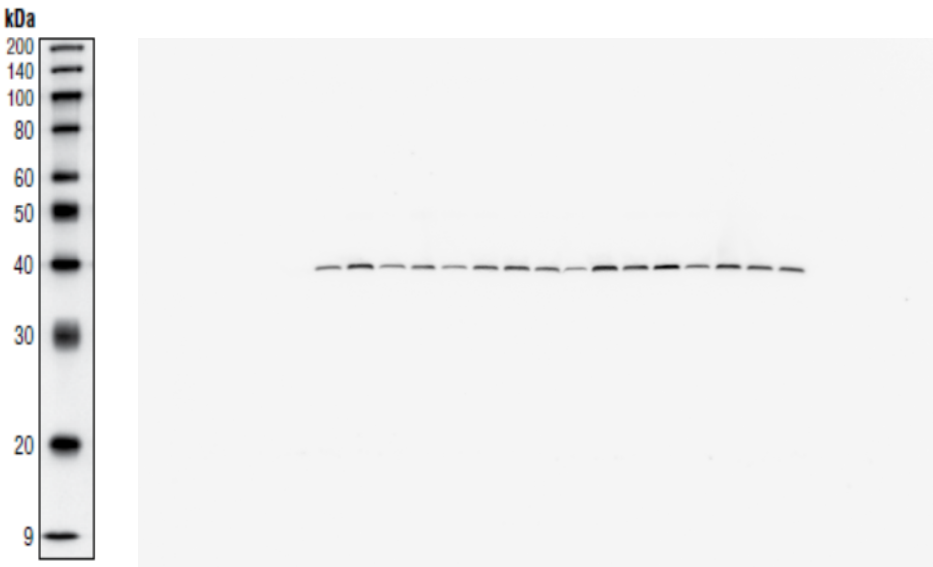

### ATP5A1

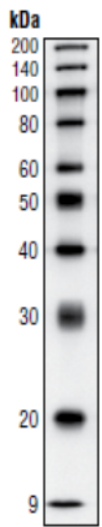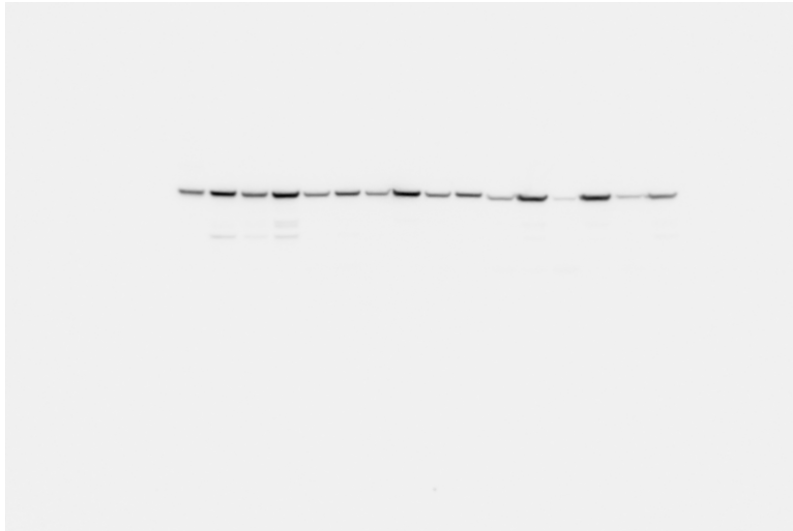

### ATPAF1

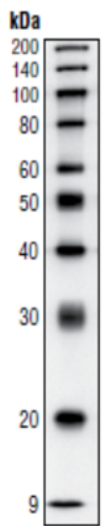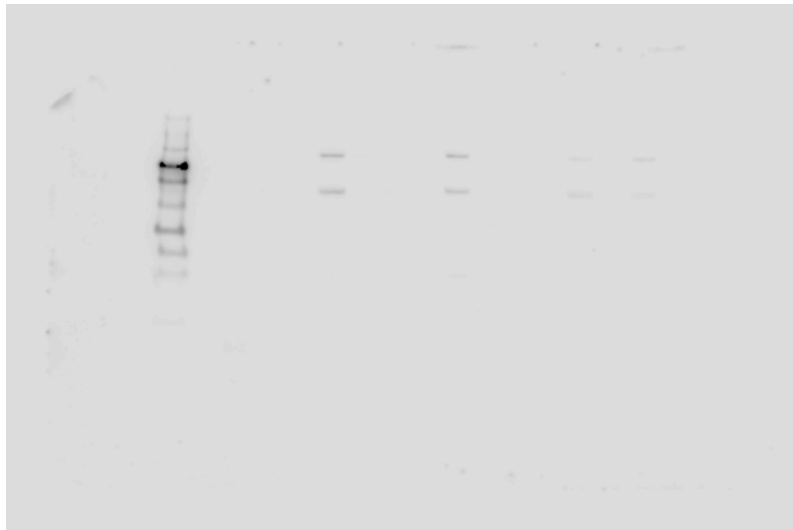

### ATP5G1/G2/G3:

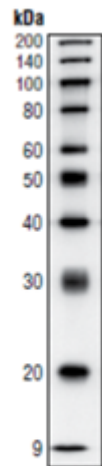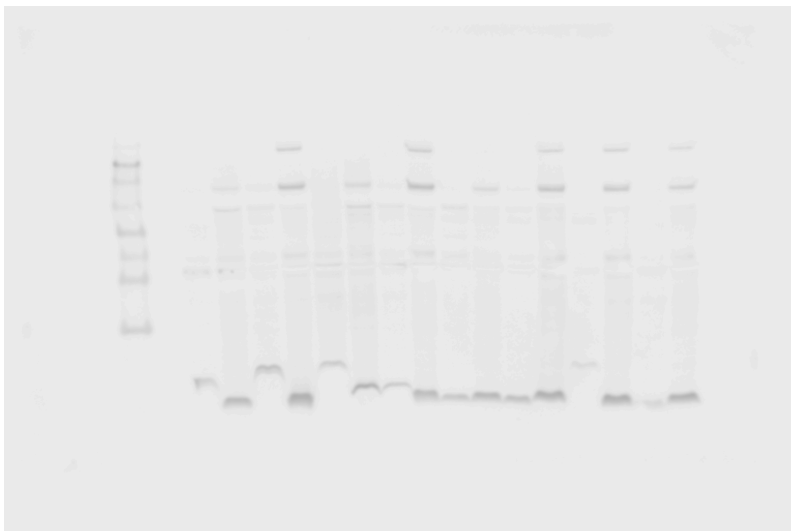

**Figure S5:** Immunohistochemical staining of ATP5A1, ATP5G1/G2/G3 and ATPAF1 in normal renal tissue (left) and clear cell renal cell carcinoma (right).

**ATP5A1**

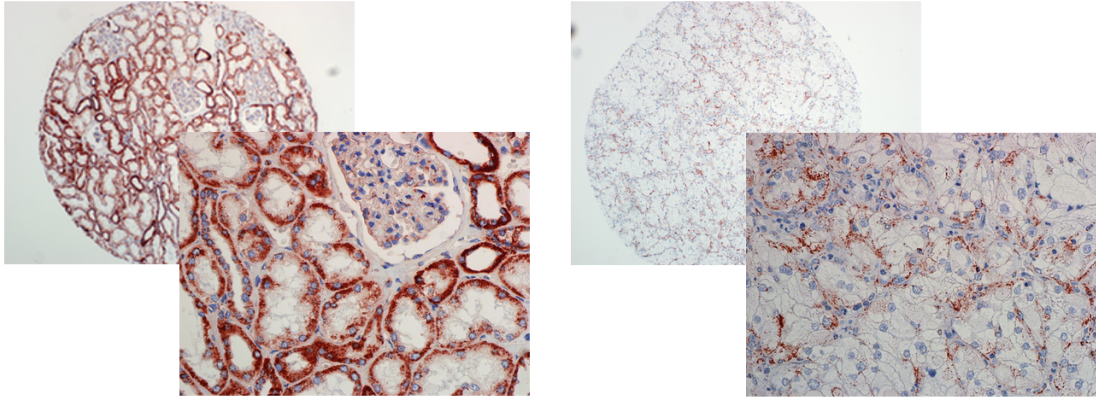

**ATP5G1/G2/G3**

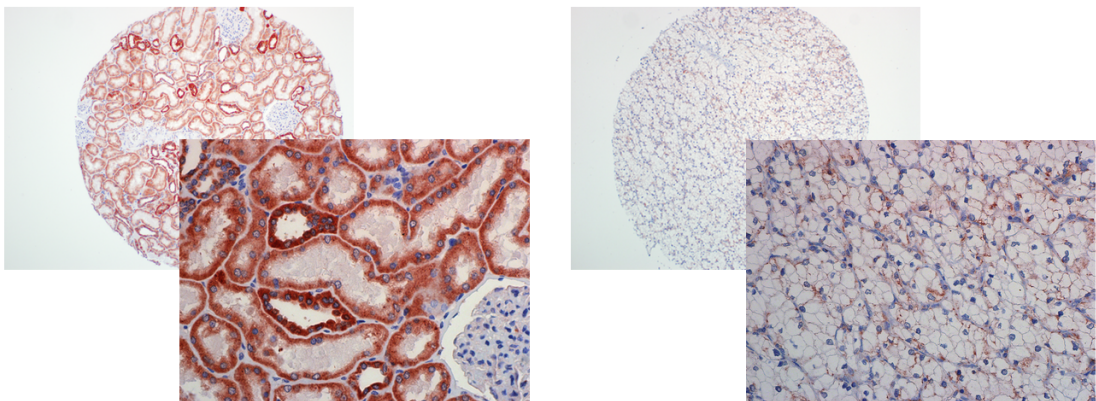

**ATPAF1**

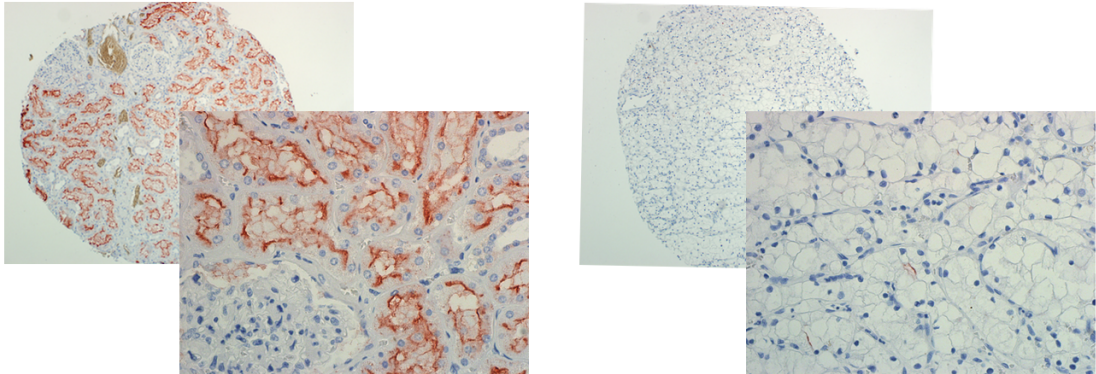

Supplement: mmc1.pdf [file mmc1.pdf]
